# Supplementary material for: Human and Murine Hematopoietic Stem Cell Aging Is Associated with Functional Impairments and Intrinsic Megakaryocytic/Erythroid Bias
Source: PLoS One. 2016 Jul 1;11(7):e0158369. doi: 10.1371/journal.pone.0158369 (PMC4930192; doi:10.1371/journal.pone.0158369)
Supplement: S5 Table — Mouse gene sets of probes used for gene set enrichment analyses. (XLSX) [file pone.0158369.s009.xlsx]

## Sheet: Blad1
HSC_up_unique	HSC_down_unique		3 progenitors_CLP_cluster1_unique	3 progenitors_pGM_cluster3_unique	3 progenitors_preMegE_cluster11_unique		4 progenitors_CLP_cluster1_unique	4 progenitors_MkP_cluster5_unique	4 progenitors_pGM_cluster12_unique	4 progenitors_preCFUE_cluster13_unique
na	na		na	na	na		na	na	na	na
1457429_s_at	1431213_a_at		1449898_at	1452584_at	1456885_at		1449898_at	1439833_at	1452225_at	1436990_s_at
1448961_at	1453144_at		1453850_at	1429073_at	1430276_at		1440159_at	1429037_at	1428990_at	1450744_at
1453357_at	1451335_at		1460425_at	1428990_at	1430182_a_at		1453340_at	1440793_at	1429281_at	1423739_x_at
1437356_at	1452757_s_at		1440176_x_at	1418625_s_at	1427879_at		1428947_at	1431245_at	1448407_at	1422492_at
1437689_x_at	1415960_at		1428705_at	1416619_at	1426991_at		1452861_at	1442129_at	1441972_at	1451508_at
1417818_at	1437868_at		1454009_at	1416607_at	1435378_at		1431067_at	1430252_at	1451571_s_at	1418164_at
1418674_at	1450781_at		1428984_a_at	1452952_at	1441957_x_at		1429089_s_at	1432541_at	1424016_at	1447100_s_at
1428359_s_at	1452050_at		1449239_at	1440879_at	1428097_at		1431880_at	1420580_at	1440879_at	1424011_at
1417552_at	1439364_a_at		1453340_at	1456812_at	1425408_a_at		1432905_at	1432204_at	1456812_at	1419833_s_at
1442542_at	1450068_at		1430461_at	1451355_at	1435672_at		1429969_at	1454450_at	1422997_s_at	1437286_x_at
1460259_s_at	1436876_at		1428947_at	1422997_s_at	1434126_at		1430622_at	1432734_at	1417094_at	1434585_at
1419665_a_at	1455439_a_at		1452861_at	1456735_x_at	1456446_at		1431854_a_at	1454417_at	1416094_at	1444769_at
1417853_at	1422411_s_at		1432152_at	1448460_at	1432671_at		1437918_at	1431965_at	1434329_s_at	1418337_at
1456226_x_at	1455660_at		1429089_s_at	1433725_at	1434497_at		1452794_x_at	1456210_at	1452002_at	1429005_at
1450958_at	1449222_at		1429969_at	1421858_at	1430943_at		1438356_x_at	1453073_at	1416645_a_at	1448013_at
1437385_at	1419905_s_at		1430622_at	1454727_at	1420630_at		1432336_at	1452903_at	1455914_at	1423693_at
1421096_at	1427001_s_at		1453387_at	1445647_at	1428285_at		1454435_at	1428285_at	1450387_s_at	1449442_at
1457691_at	1449109_at		1431515_at	1435879_at	1430221_at		1432886_at	1427655_a_at	1453173_at	1450044_at
1417839_at	1420404_at		1452794_x_at	1455282_x_at	1434574_at		1430159_at	1458234_at	1437767_s_at	1425145_at
1443933_at	1427242_at		1431524_at	1452016_at	1456634_at		1440534_at	1449588_at	1455282_x_at	1450742_at
1420558_at	1457102_at		1454435_at	1460330_at	1436073_at		1454897_at	1422635_at	1419091_a_at	1435148_at
1418488_s_at	1424733_at		1432886_at	1452657_at	1438531_at		1441977_at	1428585_at	1460330_at	1441942_x_at
1435858_at	1439622_at		1441372_at	1455164_at	1437263_at		1444484_at	1423449_a_at	1454916_s_at	1455787_x_at
1435792_at	1430943_at		1443194_at	1431980_a_at	1449818_at		1457319_at	1438266_at	1429535_at	1441693_at
1433707_at	1418465_at		1440534_at	1416735_at	1459782_x_at		1435640_x_at	1435710_at	1415780_a_at	1449181_at
1422557_s_at	1430534_at		1453697_at	1428937_at	1415732_at		1439529_at	1422184_a_at	1416226_at	1451386_at
1433741_at	1416008_at		1433836_a_at	1419922_s_at	1441693_at		1434046_at	1441962_at	1419081_at	1419964_s_at
1436739_at	1436966_at		1432753_at	1425934_a_at	1418128_at		1441291_at	1433769_at	1416951_a_at	1422186_s_at
1416411_at	1450079_at		1454171_x_at	1421824_at	1450054_at		1418677_at	1452124_at	1434451_at	1435505_at
1439795_at	1434920_a_at		1441197_at	1424025_at	1434450_s_at		1454799_at	1436294_at	1425934_a_at	1433759_at
1434553_at	1449270_at		1441977_at	1421818_at	1459692_at		1433465_a_at	1429015_at	1418345_at	1419147_at
1449570_at	1419480_at		1444484_at	1437232_at	1435048_at		1425163_at	1454745_at	1421818_at	1436419_a_at
1447849_s_at	1448183_a_at		1457319_at	1433868_at	1437325_x_at		1418204_s_at	1417704_a_at	1426490_at	1451671_at
1418187_at	1456498_at		1435640_x_at	1455771_at	1416468_at		1437813_at	1421043_s_at	1429048_at	1421877_at
1456212_x_at	1441317_x_at		1439529_at	1456437_x_at	1418601_at		1419241_a_at	1436768_x_at	1437232_at	1417725_a_at
1436568_at	1434413_at		1442580_at	1423954_at	1429850_x_at		1419706_a_at	1426239_s_at	1433868_at	1434065_at
1436265_at	1452187_at		1434046_at	1451499_at	1434601_at		1447912_x_at	1453109_at	1455771_at	1438910_a_at
1434802_s_at	1450234_at		1427052_at	1433806_x_at	1422573_at		1445867_at	1436181_at	1417009_at	1455244_at
1423278_at	1424800_at		1437091_at	1418981_at	1419421_at		1447738_s_at	1433888_at	1423954_at	1451401_a_at
1460039_at	1449232_at		1425355_at	1417936_at	1419773_at		1437217_at	1442742_at	1417605_s_at	1436194_at
1422868_s_at	1419307_at		1448327_at	1448698_at	1416203_at		1429247_at	1428568_at	1449297_at	1420385_at
1453851_a_at	1421955_a_at		1447293_x_at	1421186_at	1424011_at		1432125_at	1438107_x_at	1455991_at	1424119_at
1439794_at	1458374_at		1427139_at	1449164_at	1419833_s_at		1419232_a_at	1456393_at	1434962_x_at	1437363_at
1419392_at	1423066_at		1429214_at	1418982_at	1423902_s_at		1422982_at	1460382_at	1417936_at	1418909_at
1425492_at	1452912_at		1434932_at	1423233_at	1435092_at		1444311_at	1441409_at	1424420_at	1416730_at
1454906_at	1415897_a_at		1458112_at	1428573_at	1427002_s_at		1421164_a_at	1420888_at	1421186_at	1438740_at
1439527_at	1436847_s_at		1436928_s_at	1419605_at	1423061_at		1438464_at	1437006_x_at	1449130_at	1439047_s_at
1449199_at	1452811_at		1446463_at	1420699_at	1434961_at		1419028_at	1416405_at	1421647_at	1428797_at
1447693_s_at	1442791_x_at		1426249_at	1452035_at	1426015_s_at		1439036_a_at	1458370_at	1435903_at	1445551_at
1420514_at	1459804_at		1433819_s_at	1424051_at	1443868_at		1428126_a_at	1429273_at	1434376_at	1448112_at
1444615_x_at	1420444_at		1454799_at	1435450_at	1435148_at		1449364_at	1434769_at	1427301_at	1438925_x_at
1452981_at	1433862_at		1425163_at	1423352_at	1426304_x_at		1445536_at	1428490_at	1449164_at	1418710_at
1416579_a_at	1423557_at		1418204_s_at	1418097_a_at	1452390_at		1418014_a_at	1444984_at	1435220_s_at	1422021_at
1427345_a_at	1439510_at		1437813_at	1434369_a_at	1454820_at		1435128_at	1444815_at	1418982_at	1425074_at
1460509_at	1456772_at		1419241_a_at	1421326_at	1437264_at		1456328_at	1423222_at	1423233_at	1455841_s_at
1431146_a_at	1418600_at		1419706_a_at	1418806_at	1428454_at		1427210_at	1433681_x_at	1428253_at	1427008_at
1416779_at	1452730_at		1437217_at	1420731_a_at	1451386_at		1445711_at	1418748_at	1419605_at	1422966_a_at
1449588_at	1436171_at		1456252_x_at	1426195_a_at	1416922_a_at		1456632_at	1427912_at	1420330_at	1455814_x_at
1457632_s_at	1429658_a_at		1448751_at	1416382_at	1427270_a_at		1434463_at	1436426_at	1420699_at	1438711_at
1450723_at	1416193_at		1422982_at	1419594_at	1437606_at		1449233_at	1415907_at	1418659_at	1451596_a_at
1417644_at	1438009_at		1419746_at	1443814_x_at	1426083_a_at		1422775_at	1459978_x_at	1424051_at	1455025_at
1418472_at	1452458_s_at		1421164_a_at	1417869_s_at	1434645_at		1454880_s_at	1421547_at	1448730_at	1454622_at
1428942_at	1439208_at		1452303_at	1450020_at	1448093_s_at		1449453_at	1416066_at	1438156_x_at	1428359_s_at
1428136_at	1418826_at		1438464_at	1448804_at	1457956_at		1419940_at	1421963_a_at	1423352_at	1421088_at
1425702_a_at	1447869_x_at		1419028_at	1417070_at	1449839_at		1439104_at	1427095_at	1460220_a_at	1416740_at
1422912_at	1438585_at		1421167_at	1453487_at	1453166_at		1444958_at	1421123_at	1421326_at	1428942_at
1434891_at	1460304_a_at		1445701_at	1437071_at	1439109_at		1447965_at	1416253_at	1420731_a_at	1449057_at
1417235_at	1456328_at		1433935_at	1422928_at	1419413_at		1437898_at	1425675_s_at	1417491_at	1452740_at
1433776_at	1416802_a_at		1445536_at	1416414_at	1418762_at		1457703_at	1421267_a_at	1416382_at	1439739_at
1460011_at	1416558_at		1437667_a_at	1422824_s_at	1418710_at		1440940_at	1453769_at	1419594_at	1448687_at
1416271_at	1419153_at		1435128_at	1424766_at	1416330_at		1423802_at	1421182_at	1443814_x_at	1424437_s_at
1424099_at	1454694_a_at		1445711_at	1453634_a_at	1421963_a_at		1435996_at	1454849_x_at	1417869_s_at	1439109_at
1421642_a_at	1419513_a_at		1456005_a_at	1417203_at	1424968_at		1437937_at	1426662_at	1450020_at	1422400_a_at
1435386_at	1417184_s_at		1424814_a_at	1448929_at	1449147_at		1423466_at	1434847_at	1426440_at	1435275_at
1415964_at	1417533_a_at		1455564_at	1448509_at	1417852_x_at		1427419_x_at	1436795_at	1420543_at	1417430_at
1418464_at	1417587_at		1434463_at	1422567_at	1460259_s_at		1440808_x_at	1451469_at	1436300_at	1453047_at
1418021_at	1452470_at		1449233_at	1436576_at	1448455_at		1426120_a_at	1459197_at	1435208_at	1434497_at
1427005_at	1444468_at		1422775_at	1418340_at	1421861_at		1426396_at	1456962_at	1424065_at	1415916_a_at
1445723_at	1424443_at		1451780_at	1448620_at	1450476_at		1425736_at	1434755_at	1423695_at	1454947_a_at
1417900_a_at	1452052_s_at		1454880_s_at	1452410_a_at	1450857_a_at		1428187_at	1453770_at	1417977_at	1434553_at
1448749_at	1424118_a_at		1449453_at	1450694_at	1416740_at		1418830_at	1455009_at	1422928_at	1420468_at
1416700_at	1417777_at		1435580_at	1433833_at	1458345_s_at		1457838_at	1420618_at	1451991_at	1418601_at
1437466_at	1455451_at		1444958_at	1437247_at	1435275_at		1433451_at	1455672_s_at	1434714_at	1448383_at
1441975_at	1427167_at		1447965_at	1451354_at	1455372_at		1440332_at	1433733_a_at	1426505_at	1435463_s_at
1435436_at	1439434_x_at		1440940_at	1416046_a_at	1422493_at		1457039_at	1452366_at	1448929_at	1428706_at
1448852_at	1437251_at		1452050_at	1434123_at	1426951_at		1451615_at	1449093_at	1448620_at	1426802_at
1428420_a_at	1424486_a_at		1423942_a_at	1420756_at	1419036_at		1422758_at	1420930_s_at	1421855_at	1436481_at
1416468_at	1425548_a_at		1429622_at	1419829_a_at	1460318_at		1448724_at	1433908_a_at	1433833_at	1460010_a_at
1439862_at	1450920_at		1427146_at	1417823_at	1433908_a_at		1436039_at	1435358_at	1437891_at	1418172_at
1428738_a_at	1424278_a_at		1444426_at	AFFX-GapdhMur/M32599_3_at	1418758_a_at		1438354_x_at	1418867_at	1416046_a_at	1439794_at
1417507_at	1418264_at		1427419_x_at	1453416_at	1435701_at		1433958_at	1417651_at	1420756_at	1417584_at
1455340_at	1423124_x_at		1419769_at	1425503_at	1442714_at		1458097_at	1416194_at	1452583_s_at	1425428_at
1453055_at	1417910_at		1426120_a_at	1436016_x_at	1441115_at		1456953_at	1457321_at	1434399_at	1452324_at
1435493_at	1435375_at		1426396_at	1418248_at	1420694_a_at		1457633_x_at	1440928_at	1435906_x_at	1449839_at
1419758_at	1437935_at		1425736_at	1424927_at	1426915_at		1416326_at	1437085_at	1418392_a_at	1449048_s_at
1438224_at	1454822_x_at		1451910_a_at	1452935_at	1451453_at		1437056_x_at	1433558_at	1436016_x_at	1438510_a_at
1457824_at	1448626_at		1418830_at	1418451_at	1417516_at		1425155_x_at	1420694_a_at	1449526_a_at	1448566_at
1448390_a_at	1455990_at		1418712_at	1448148_at	1446424_at		1419735_at	1450670_at	1416205_at	1424902_at
1435783_at	1452740_at		1457838_at	1416416_x_at	1424936_a_at		1419334_at	1438712_at	1428374_at	1456087_at
1415904_at	1425513_at		1438314_at	1430332_a_at	1450162_at		1422592_at	1431167_at	1448253_at	1451257_at
1423513_at	1451243_at		1433451_at	1434876_at	1456533_at		1422680_at	1416918_at	1460351_at	1436827_at
1433855_at	1439808_at		1440332_at	1415743_at	1424229_at		1431763_a_at	1423671_at	1439065_x_at	1436168_at
1426911_at	1424051_at		1417074_at	1435490_at	1436186_at		1447244_at	1452220_at	1417505_s_at	1449077_at
1436624_at	1454862_at		1448281_a_at	1434735_at	1418285_at		1446929_at	1416534_at	1452935_at	1422573_at
1440681_at	1419062_at		1436990_s_at	1434875_a_at	1416012_at		1452343_at	1434472_at	1455089_at	1417049_at
1424713_at	1417938_at		1452092_at	1427000_at	1425702_a_at		1441028_at	1432868_at	1420997_a_at	1424649_a_at
1434070_at	1415818_at		1448724_at	1448881_at	1450380_at		1458507_at	1417235_at	1428767_at	1416387_at
1448021_at	1435575_at		1416610_a_at	1421408_at	1423344_at		1442434_at	1424097_at	1430332_a_at	1453004_at
1451660_a_at	1439764_s_at		1434651_a_at	1418219_at	1418909_at		1447592_at	1435289_at	1434876_at	1460701_a_at
1438868_at	1428105_at		1436474_at	1434903_s_at	1435631_x_at		1439082_at	1460356_at	1417287_at	1438095_x_at
1448383_at	1436233_at		1422166_at	1418665_at	1449305_at		1450707_at	1436926_at	1454713_s_at	1459692_at
1433579_at	1430435_at		1436039_at	1418045_at	1437308_s_at		1449411_at	1428867_at	1435490_at	1417562_at
1458318_at	1448314_at		1427312_at	1455257_at	1450724_at		1458643_at	1449305_at	1433444_at	1419421_at
1435701_at	1436838_x_at		1438354_x_at	1426530_a_at	1434273_at		1439429_x_at	1424595_at	1434636_at	1424086_at
1439078_at	1457110_at		1433958_at	1448550_at	1448021_at		1434297_at	1450852_s_at	1448881_at	1447774_x_at
1455257_at	1452305_s_at		1456953_at	1426261_s_at	1436827_at		1416301_a_at	1445680_x_at	1450647_at	1455048_at
1449799_s_at	1436853_a_at		1426947_x_at	1434500_at	1428196_a_at		1448507_at	1449269_at	1434282_at	1419402_at
1457123_at	1452035_at		1457633_x_at	1436200_at	1417480_at		1454931_at	1418879_at	1422433_s_at	1448499_a_at
1418209_a_at	1415811_at		1437056_x_at	1425548_a_at	1456014_s_at		1416529_at	1428122_s_at	1417474_at	1441957_x_at
1451006_at	1447436_at		1422592_at	1421571_a_at	1453006_at		1449937_at	1454181_at	1421408_at	1453220_at
1420699_at	1439272_at		1457075_at	1439426_x_at	1439189_at		1428739_at	1436403_at	1437542_at	1429254_at
1427183_at	1453003_at		1448076_at	1423547_at	1434002_at		1452163_at	1452073_at	1418219_at	1424777_at
1428867_at	1438869_at		1431763_a_at	1453152_at	1456753_at		1422607_at	1437063_at	1434387_at	1420712_a_at
1437263_at	1423809_at		1458126_at	1428112_at	1418518_at		1418635_at	1456014_s_at	1418741_at	1416273_at
1435176_a_at	1438571_at		1451466_at	1419169_at	1449519_at		1450106_a_at	1417872_at	1436213_a_at	1449936_at
1426063_a_at	1418351_a_at		1452343_at	1449965_at	1453851_a_at		1419133_at	1449429_at	1440355_at	1435389_at
1448873_at	1447903_x_at		1440468_at	1430439_at	1423236_at		1444844_at	1422024_at	1416324_s_at	1455359_at
1454609_x_at	1434789_at		1442434_at	1438325_at	1444066_at		1418773_at	1434339_at	1426530_a_at	1416279_at
1417797_a_at	1450639_at		1447592_at	1434447_at	1449232_at		1457728_at	1442315_at	1444040_at	1429778_at
1432198_at	1419497_at		1456943_a_at	1420911_a_at	1428816_a_at		1435138_at	1448259_at	1416344_at	1421682_a_at
1435542_s_at	1429448_s_at		1433564_at	1451643_a_at	1449288_at		1455872_at	1452117_a_at	1455235_x_at	1434256_s_at
1418934_at	1417457_at		1450707_at	1416759_at	1420399_at		1425062_at	1453851_a_at	1455439_a_at	1433789_at
1425216_at	1419172_at		1438279_at	1455214_at	1438973_x_at		1450282_at	1453416_at	1420981_a_at	1457670_s_at
1443997_at	1438212_at		1449411_at	1451858_at	1424008_a_at		1416983_s_at	1428816_a_at	1434790_a_at	1422920_at
1429133_at	1440297_at		1458643_at	1420572_at	1460130_at		1418776_at	1435750_at	1421571_a_at	1452744_at
1455647_at	1417837_at		1439429_x_at	1439956_at	1422400_a_at		1439015_at	1435749_at	1450626_at	1455580_at
1447725_at	1434326_x_at		1437866_at	1450234_at	1447791_s_at		1433716_x_at	1417962_s_at	1426648_at	1419773_at
1449379_at	1421005_at		1434297_at	1448856_a_at	1419469_at		1451843_a_at	1421732_at	1437494_at	1419014_at
1456606_a_at	1427950_at		1447840_x_at	1454824_s_at	1422316_at		1424375_s_at	1441582_at	1449965_at	1456653_a_at
1450380_at	1424629_at		1444177_at	1423321_at	1422977_at		1444181_at	1448080_at	1434447_at	1428196_a_at
1455029_at	1416072_at		1416301_a_at	1428608_at	1422817_at		1444283_at	1424008_a_at	1415897_a_at	1456440_s_at
1421073_a_at	1441280_at		1448507_at	1436051_at	1419013_at		1437756_at	1427593_at	1452224_at	1454962_at
1420693_at	1417450_a_at		1435804_at	1417706_at	1421088_at		1442812_at	1448530_at	1451858_at	1434601_at
1422573_at	1436808_x_at		1449581_at	1454809_at	1434725_at		1425008_a_at	1426517_at	1420572_at	1416492_at
1426887_at	1456064_at		1449937_at	1435383_x_at	1425458_a_at		1441647_at	1422208_a_at	1439956_at	1425029_a_at
1439018_at	1425837_a_at		1428739_at	1428600_at	1418508_a_at		1441762_at	1448942_at	1450234_at	1449353_at
1428960_at	1459253_at		1447712_x_at	1424265_at	1425643_at		1439111_at	1422316_at	1416092_a_at	1428623_at
1457140_s_at	1418369_at		1421151_a_at	1448943_at	1419297_at		1459916_at	1422977_at	1421836_at	1417418_s_at
1421182_at	1434437_x_at		1425015_at	1432332_a_at	1420813_at		1439165_at	1452357_at	1454824_s_at	1436030_at
1449403_at	1424766_at		1426725_s_at	1420979_at	1418172_at		1431213_a_at	1419720_at	1431320_a_at	1455902_x_at
1450931_at	1424143_a_at		1422607_at	1452913_at	1425428_at		1448094_at	1447485_at	1435135_at	1426453_at
1453065_at	1433408_a_at		1418635_at	1438011_at	1440559_at		1440900_at	1439795_at	1420808_at	1448167_at
1429097_at	1436419_a_at		1440885_at	1424650_at	1431049_at		1447559_at	1439150_x_at	1454809_at	1440990_at
1423233_at	1424991_s_at		1419133_at	1437181_at	1422930_at		1442616_at	1418186_at	1448513_a_at	1427490_at
1418892_at	1434929_at		1435910_at	1426554_a_at	1455687_at		1442305_at	1423891_at	1424265_at	1419251_at
1435313_at	1419123_a_at		1453955_a_at	1439435_x_at	1455048_at		1432492_a_at	1434141_at	1448943_at	1448371_at
1441994_at	1434129_s_at		1457728_at	1454862_at	1417141_at		1456631_at	1420872_at	1454691_at	1423059_at
1436566_at	1450387_s_at		1455872_at	1448749_at	1419042_at		1425551_at	1434423_at	1416412_at	1456574_at
1416041_at	1419091_a_at		1457921_at	1417346_at	1425145_at		1434904_at	1436517_at	1453196_a_at	1430182_a_at
1455087_at	1419538_at		1438641_x_at	1416165_at	1450297_at		1442684_x_at	1418350_at	1434510_at	1431089_at
1459903_at	1429270_a_at		1447632_at	1449259_at	1437856_at		1425589_at	1438912_at	1426950_at	1455713_x_at
1435660_at	1419206_at		1442092_at	1451358_a_at	1427381_at		1436598_at	1435977_at	1416875_at	1449935_a_at
1443541_at	1427311_at		1425896_a_at	1439622_at	1456944_at		1432520_at	1419806_at	1419006_s_at	1421278_s_at
1458591_at	1460723_at		1425062_at	1448754_at	1434838_at		1455530_at	1459052_at	1426554_a_at	1437194_x_at
1426784_at	1425753_a_at		1450282_at	1429359_s_at	1449057_at		1420176_x_at	1428433_at	1454862_at	1438422_at
1453220_at	1420463_at		1425911_a_at	1455576_at	1440990_at		1437808_x_at	1421983_s_at	1420664_s_at	1434006_at
1417392_a_at	1460247_a_at		1420700_s_at	1439153_at	1418600_at		1422177_at	1424367_a_at	1419669_at	1455800_x_at
1437939_s_at	1453152_at		1423100_at	1455165_at	1460050_x_at		1419671_a_at	1417901_a_at	1422962_a_at	1449575_a_at
1426880_at	1447363_s_at		1416983_s_at	1418448_at	1421654_a_at		1448576_at	1423754_at	1434314_s_at	1433984_a_at
1418025_at	1441206_at		1421140_a_at	1452767_at	1418288_at		1430495_at	1439764_s_at	1418891_a_at	1435859_x_at
1460632_at	1416698_a_at		1422350_at	1434131_at	1452836_at		1418983_at	1433950_at	1456980_at	1419213_at
1417872_at	1425084_at		1443656_at	1421375_a_at	1455398_at		1448034_at	1417758_at	1439622_at	1454842_a_at
1454832_at	1453226_at		1440342_at	1448005_at	1448870_at		1418265_s_at	1454966_at	1452283_at	1437296_at
1455706_at	1428861_at		1427749_at	1440173_x_at	1437404_at		1424834_s_at	1455257_at	1423134_at	1428803_at
1430387_at	1451418_a_at		1422915_at	1433750_at	1451141_at		1435885_s_at	1423608_at	1429321_at	1429458_at
1417962_s_at	1416641_at		1418776_at	1416549_at	1442000_at		1452809_at	1421520_at	1451243_at	1422926_at
1424076_at	1434748_at		1439015_at	1420054_s_at	1434221_at		1425104_at	1429796_at	1457627_x_at	1434210_s_at
1427318_s_at	1444952_a_at		1433716_x_at	1428793_at	1448383_at		1436607_a_at	1456944_at	1455165_at	1425157_x_at
1449036_at	1419253_at		1424375_s_at	1418030_at	1419402_at		1455990_at	1431690_at	1439780_at	1418961_at
1418981_at	1418261_at		1456762_at	1448377_at	1428942_at		1421312_a_at	1441590_at	1433773_at	1431086_s_at
1423274_at	1425263_a_at		1444283_at	1428822_a_at	1417155_at		1431630_a_at	1449379_at	1418101_a_at	1416050_a_at
1416053_at	1422679_s_at		1442812_at	1423363_at	1452740_at		1452707_at	1419507_at	1434131_at	1455453_at
1455610_at	1433796_at		1450582_at	1451418_a_at	1439101_at		1418998_at	1436178_at	1426510_at	1435048_at
1433857_at	1423920_at		1440507_at	1421891_at	1435463_s_at		1453327_at	1449531_at	1426555_at	1426388_s_at
1428614_at	1427094_at		1441647_at	1455706_at	1437285_at		1458354_x_at	1433776_at	1452141_a_at	1423468_at
1434272_at	1417975_at		1459916_at	1435396_at	1452196_a_at		1460651_at	1425041_at	1425179_at	1451296_x_at
1418502_a_at	1423714_at		1440273_at	1435081_at	1418962_at		1438687_at	1418230_a_at	1422595_s_at	1452226_at
1452387_a_at	1450496_a_at		1431213_a_at	1456792_at	1456087_at		1439145_at	1452812_at	1428440_at	1451453_at
1416996_at	1423521_at		1442523_at	1427608_a_at	1434315_at		1454984_at	1426697_a_at	1416549_at	1460673_at
1425484_at	1453769_at		1428038_at	1428972_at	1451170_s_at		1441321_at	1436378_at	1420054_s_at	1435416_x_at
1454745_at	1457669_x_at		1448094_at	1419537_at	1434709_at		1417143_at	1459873_x_at	1434537_at	1421286_a_at
1423323_at	1450476_at		1423945_a_at	1456250_x_at	1439794_at		1448655_at	1423284_at	1436472_at	1418474_at
1417178_at	1434958_at		1426462_at	1426721_s_at	1438684_at		1416930_at	1434837_at	1452276_at	1440221_at
1422632_at	1436509_at		1447559_at	1450984_at	1455796_x_at		1441952_x_at	1451053_a_at	1450901_a_at	1457883_at
1417021_a_at	1425370_a_at		1443686_at	1429059_s_at	1435679_at		1438403_s_at	1452864_at	1451821_a_at	1436712_at
1447623_s_at	1437185_s_at		1440837_at	1426436_at	1455025_at		1456429_at	1447833_x_at	1451036_at	1420138_at
1448933_at	1451013_at		1432492_a_at	1417030_at	1424214_at		1440333_at	1428804_at	1451418_a_at	1431890_a_at
1429824_at	1440299_at		1454803_a_at	1426434_at	1438672_at		1425513_at	1443668_x_at	1452616_s_at	1421260_a_at
1428615_at	1427707_a_at		1456631_at	1415906_at	1449916_at		1450244_a_at	1437260_at	1421891_at	1451239_a_at
1426246_at	1455609_at		1418102_at	1450298_at	1436124_at		1424719_a_at	1418664_at	1455706_at	1460241_a_at
1457745_at	1448502_at		1425551_at	1428660_s_at	1458341_x_at		1437034_x_at	1421461_at	1435396_at	1424019_at
1449078_at	1450641_at		1434904_at	1460271_at	1456532_at		1451058_at	1459665_s_at	1423543_at	1434658_at
1452792_at	1452598_at		1425804_at	1416009_at	1417689_a_at		1442623_at	1460566_at	1451544_at	1439214_a_at
1419457_at	1443172_at		1428662_a_at	1448782_at	1419365_at		1426557_at	1427769_x_at	1428596_at	1439932_at
1418872_at	1438756_at		1448629_at	1434465_x_at	1418209_a_at		1438239_at	1420693_at	1433471_at	1433499_at
1455653_at	1455730_at		1423639_at	1437358_at	1428665_at		1417234_at	1452251_at	1454646_at	1434838_at
1423428_at	1427630_x_at		1451913_a_at	1437921_x_at	1439858_at		1438568_at	1422737_at	1426772_x_at	1451707_s_at
1423835_at	1437226_x_at		1436598_at		1416387_at		1458136_at	1437853_x_at	1427608_a_at	1437520_a_at
1452196_a_at	1416746_at		1426597_s_at		1453750_x_at		1421402_at	1443277_at	1419537_at	1416792_at
1417025_at	1452279_at		1455530_at		1438711_at		1449550_at	1436959_x_at	1426721_s_at	1429261_at
1433919_at	1438434_at		1420176_x_at		1451718_at		1451123_at	1431431_a_at	1452666_a_at	1450643_s_at
1449174_at	1430530_s_at		1447202_at		1457824_at		1424847_at	1449377_at	1423176_at	1448178_a_at
1417216_at	1417506_at		1437808_x_at		1424902_at		1422952_at	1417985_at	1428660_s_at	1435287_at
1424872_at	1418184_at		1419671_a_at		1450905_at		1443817_x_at	1423231_at	1460271_at	1455422_x_at
1456229_at	1449401_at		1439357_at		1457883_at		1458998_at	1433098_at	1451860_a_at	1424953_at
1447640_s_at	1416184_s_at		1421628_at		1416933_at		1424502_at	1427535_s_at	1435665_at	1449097_at
1460242_at	1454708_at		1417546_at		1448379_at		1458396_at	1419108_at	1416009_at	1443864_at
1421818_at	1438988_x_at		1448576_at		1435787_at		1452815_at	1424359_at	1426223_at	1419034_at
1456532_at	1439959_at		1418983_at		1430636_at		1428700_at	1459402_at	1448782_at	1434916_at
1417654_at	1435114_at		1448034_at		1452249_at		1450025_at	1460719_a_at	1436890_at	1417671_at
1428083_at	1448008_at		1418110_a_at		1434248_at		1445888_x_at	1427169_at	1423106_at	1416553_at
1452191_at	1416544_at		1421173_at		1449876_at		1449420_at	1428647_at	1415768_a_at	1436752_at
1420502_at	1456280_at		1419128_at		1455135_at		1452202_at	1447577_x_at	1425022_at	1452963_at
1452280_at	1418206_at		1435885_s_at		1439739_at		1435457_at	1437648_at	1435893_at	1424102_at
1423722_at	1429831_at		1422222_at		1434138_at		1453541_at	1418840_at	1451929_a_at	1419978_s_at
1428450_at	1422000_at		1426431_at		1418749_at		1421069_at	1419389_at	1424602_s_at	1426976_at
1421628_at	1416956_at		1441317_x_at		1455359_at		1451737_at	1458341_x_at	1435824_at	1442145_at
1433586_at	1431591_s_at		1421981_at		1417703_at		1443816_s_at	1428319_at	1419898_s_at	1418856_a_at
1428267_at	1436174_at		1449464_at		1452324_at		1442310_at	1455477_s_at	1426654_at	1437377_a_at
1415919_at	1424854_at		1419826_at		1439610_at		1455343_at	1445223_at	1441997_at	1418521_a_at
1452695_at	1449193_at		1421312_a_at		1450167_at		1418201_at	1448995_at	1453212_at	1424428_at
1446342_at	1417971_at		1452707_at		1436566_at		1457748_at	1418835_at	1440226_at	1428296_at
1434969_at	1415878_at		1421587_at		1449048_s_at		1456066_a_at	1424468_s_at	1416370_at	1433739_at
1446520_at	1451567_a_at		1453327_at		1419068_at		1416957_at	1435262_at		1433706_a_at
1418415_at	1426239_s_at		1434227_at		1417914_at		1438478_a_at	1440143_at		1426481_at
1440339_at	1432391_at		1438687_at		1437012_x_at		1420743_a_at	1440454_at		1423101_at
1422184_a_at	1436669_at		1439145_at		1428343_at		1460419_a_at	1421834_at		1436573_at
1456111_at	1456055_x_at		1454984_at		1419147_at		1441991_at	1438974_x_at		1417581_at
1439568_at	1455872_at		1460738_at		1435389_at		1457493_at	1441870_s_at		1452164_at
1435342_at	1458951_at		1441321_at		1434432_at		1430705_at	1418831_at		1448498_at
1455454_at	1449705_x_at		1448606_at		1419014_at		1437636_at	1426208_x_at		1428477_at
1452163_at	1439377_x_at		1448655_at		1417049_at		1448602_at	1435043_at		1450054_at
1456295_at	1456125_a_at		1451255_at		1422670_at		1440795_x_at	1417523_at		1455330_at
1451737_at	1452073_at		1416930_at		1423729_a_at		1437697_at	1460406_at		1436737_a_at
1428804_at	1417832_at		1425890_at		1451024_at		1450680_at	1429514_at		1437336_x_at
1426712_at	1442038_at		1441952_x_at		1454630_at		1434669_at	1418480_at		1448580_at
1422438_at	1454714_x_at		1456060_at		1441150_x_at		1417858_at	1431046_at		1450667_a_at
1419669_at	1449581_at		1440333_at		1450276_a_at		1438030_at	1452759_s_at		1448691_at
1450138_a_at	1418036_at		1457456_at		1417011_at		1438021_at	1416498_at		1436816_at
1437936_at	1434684_at		1456028_x_at		1416778_at		1449461_at	1416782_s_at		1417931_at
1436907_at	1452581_at		1457707_at		1422668_at		1444431_at	1431851_at		1455508_at
1434645_at	1418450_at		1434603_at		1418010_a_at		1431010_a_at	1450945_at		1419499_at
1421375_a_at	1433657_at		1442623_at		1419137_at		1439159_at	1423771_at		1438117_x_at
1426938_at	1425065_at		1426557_at		1434222_at		1436876_at	1426044_a_at		1419068_at
1448529_at	1435116_at		1422145_at		1423507_a_at		1453060_at	1447623_s_at		1438315_x_at
1429447_at	1434859_at		1448416_at		1425570_at		1447852_x_at	1444232_at		1424327_at
1418773_at	1436454_x_at		1445304_at		1417584_at		1451785_at	1426246_at		1418070_at
1418050_at	1429295_s_at		1438239_at		1417622_at		1439315_at	1444257_at		1435808_at
1418946_at	1425178_s_at		1437994_x_at		1428114_at		1434008_at	1417682_a_at		1456092_at
1454901_at	1437406_x_at		1433811_at		1453004_at		1415943_at	1418749_at		1434224_at
1417027_at	1426440_at		1417234_at		1424308_at		1448793_a_at	1420261_at		1423668_at
1417455_at	1452210_at		1438568_at		1454622_at		1438934_x_at	1455405_at		1417227_at
1428834_at	1417131_at		1459665_s_at		1448566_at		1420824_at	1450344_a_at		1417141_at
1426004_a_at	1438001_x_at		1458136_at		1451707_s_at		1433723_s_at	1436448_a_at		1435245_at
1434109_at	1436434_at		1421402_at		1426663_s_at		1422988_at	1448254_at		1441796_at
1435991_at	1452597_at		1429013_at		1433559_at		1447980_s_at	1420843_at		1433595_at
1442226_at	1455814_x_at		1427556_at		1424338_at		1437504_at	1424130_a_at		1419275_at
1425570_at	1437520_a_at		1449550_at		1436853_a_at		1432023_a_at	1437342_x_at		1429441_at
1448876_at	1455220_at		1436074_at		1416359_at		1426595_at	1453491_at		1460050_x_at
1421344_a_at	1447540_at		1443817_x_at		1460722_at		1417072_at	1434549_at		1452678_a_at
1443904_at	1429871_at		1456211_at		1427677_a_at		1435418_at	1439610_at		1426218_at
1453622_s_at	1422477_at		1437485_at		1427031_s_at		1444489_at	1433947_at		1428794_at
1422444_at	1421260_a_at		1416919_a_at		1460241_a_at		1452492_a_at	1449260_at		1429091_at
1448602_at	1418340_at		1447654_at		1456147_at		1443771_x_at	1429196_at		1422922_at
1443928_at	1439553_s_at		1455917_at		1423468_at		1419358_at	1428789_at		1418326_at
1429055_at	1451158_at		1424502_at		1425530_a_at		1421245_at	1435519_at		1428265_at
1458504_at	1436078_at		1458396_at		1420505_a_at		1435997_at	1417914_at		1423242_at
1450389_s_at	1428790_at		1428700_at		1455493_at		1436584_at	1444441_at		1424006_at
1439768_x_at	1449419_at		1456403_at		1448019_at		1447806_s_at	1449331_a_at		1456541_x_at
1427299_at	1452919_a_at		1428768_at		1418788_at		1438215_at	1433979_at		1428570_at
1434804_at	1440697_at		1450025_at		1433795_at		1454246_at	1417601_at		1434011_a_at
1427004_at	1438173_x_at		1443573_at		1433428_x_at		1420928_at	1449856_at		1443869_at
1455080_at	1450694_at		1445888_x_at		1443952_at		1455695_at	1429661_at		1438973_x_at
1448145_at	1439269_x_at		1430427_a_at		1417749_a_at		1453338_at	1434794_at		1433881_at
1453310_at	1418719_at		1449420_at		1423679_at		1430367_at	1438306_at		1428897_at
1451342_at	1434079_s_at		1452202_at		1416273_at		1450448_at	1436634_at		1424712_at
1428077_at	1460241_a_at		1433694_at		1455256_at		1446416_at	1431919_at		1433513_x_at
1450839_at	1428340_s_at		1418711_at		1448297_a_at		1427685_a_at	1430497_at		1460074_x_at
1435559_at	1428029_a_at		1434974_at		1427628_at		1447657_s_at	1448426_at		1418081_at
1424394_at	1426406_at		1419309_at		1426641_at		1421594_a_at	1434490_at		1426248_at
1437284_at	1456232_at		1443816_s_at		1449041_a_at		1442149_at	1440931_at		1433692_at
1437272_at	1424847_at		1442310_at		1450004_at		1419222_at	1416778_at		1416696_at
1416895_at	1422964_at		1417288_at		1418398_a_at		1434175_s_at	1459318_at		1452830_s_at
1438877_at	1419156_at		1434889_at		1455618_x_at		1419848_x_at	1421092_at		1419798_at
1436271_at	1427953_at		1418201_at		1424649_a_at		1460128_at	1418282_x_at		1423210_a_at
1438855_x_at	1422483_a_at		1434680_at		1453047_at		1454729_at	1416666_at		1435682_at
1438122_at	1446855_at		1417133_at		1452008_at		1451344_at	1450805_at		1456111_at
1422776_at	1416173_at		1457748_at		1446771_at		1451181_at	1420688_a_at		1434113_a_at
1451451_at	1416214_at		1456066_a_at		1416689_at		1435261_at	1457465_at		1451731_at
1434788_at	1423055_at		1416957_at		1415996_at		1458480_at	1441947_x_at		1417559_at
1421605_a_at	1456471_x_at		1427835_at		1435133_at		1436600_at	1420818_at		1460444_at
1424008_a_at	1426454_at		1434990_at		1424056_at		1449577_x_at	1425570_at		1453019_at
1453122_at	1449261_at		1456774_at		1428731_at		1447284_at	1428114_at		1426374_at
1417067_s_at	1451377_a_at		1457181_at		1449993_at		1456225_x_at	1425250_a_at		1449147_at
1428604_at	1434517_at		1429309_at		1435386_at		1421600_a_at	1418446_at		1420640_at
1426910_at	1455035_s_at		1437393_at		1424750_at		1436919_at	1433448_at		1451912_a_at
1458647_at	1435840_x_at		1460419_a_at		1433910_at		1416927_at	1448889_at		1427077_a_at
1415997_at	1422303_a_at		1441991_at		1423668_at		1427018_at	1437430_at		1425704_at
1418954_at	1438852_x_at		1440186_s_at		1451046_at		1452985_at	1417415_at		1435797_at
1454649_at	1418727_at		1427872_at		1428359_s_at		1453999_at	1417116_at		1439811_at
1416590_a_at	1426739_at		1438454_at		1449353_at		1434796_at	1427048_at		1424593_at
1425506_at	1415772_at		1437636_at				1449869_at	1447761_x_at		1424812_at
1449023_a_at	1438096_a_at		1448602_at				1422416_s_at	1419329_at		1424522_at
1452431_s_at	1437378_x_at		1417246_at				1443423_at	1455226_at		1434432_at
1436698_x_at	1417274_at		1437697_at				1428504_at	1422240_s_at		1435231_at
1427986_a_at	1416773_at		1450680_at				1452641_at	1424588_at		1455398_at
1434301_at	1420142_s_at		1418065_at				1431782_s_at	1416976_at		1451379_at
1429809_at	1437211_x_at		1417858_at				1440178_x_at	1450916_at		1420959_at
1423691_x_at	1419472_s_at		1438030_at				1426360_at	1436945_x_at		1460691_at
1422744_at	1438917_x_at		1425380_at				1457037_at	1439407_x_at		1434349_at
1425792_a_at	1456585_x_at		1438021_at				1451577_at	1455903_at		1449623_at
1433651_at	1457977_at		1422846_at				1423836_at	1416827_at		1435055_a_at
1449229_a_at	1455529_at		1444431_at				1438742_at	1459216_at		1436753_at
1429262_at	1457603_at		1431010_a_at				1456816_at	1418788_at		1455372_at
1431648_at	1417417_a_at		1450158_at					1417500_a_at		1419013_at
1435312_at	1460337_at		1434044_at					1448529_at		1436394_at
1456437_x_at	1418068_at		1439159_at					1416238_at		1426690_a_at
1456789_at	1456314_x_at		1449124_at					1419089_at		1417571_at
1449620_s_at	1418481_at		1453060_at					1446625_at		1448202_x_at
1434817_s_at	1452824_at		1456800_a_at					1428074_at		1435249_at
1435085_at	1418521_a_at		1440400_at					1435201_at		1450628_at
1447831_s_at	1439360_x_at		1451785_at					1439418_x_at		1423709_s_at
1443762_s_at	1433643_at		1439449_at					1450046_at		1451523_a_at
1455642_a_at	1449127_at		1434008_at					1424133_at		1454695_at
1459913_at	1448318_at		1436084_at					1441926_x_at		1418591_at
1417704_a_at	1459832_s_at		1415943_at					1449125_at		1451377_a_at
1434180_at	1428787_at		1417654_at					1458403_at		1424596_s_at
1424072_at	1421969_a_at		1438934_x_at					1447519_x_at		1437080_s_at
1429413_at	1419275_at		1420824_at					1427628_at		1439738_at
1418269_at	1423391_at		1447980_s_at					1452630_at		1426797_at
1454685_at	1438091_a_at		1415886_at					1426784_at		1427921_s_at
1424933_at	1439253_x_at		1435955_at					1449431_at		1454841_at
1422629_s_at	1451387_s_at		1437504_at					1446771_at		1452120_at
1417757_at	1456375_x_at		1433734_at					1444214_at		1421055_at
1420682_at	1433102_at		1447808_s_at					1449008_at		1419743_s_at
1452291_at			1432023_a_at					1415862_at		1450162_at
1450976_at			1448209_a_at					1435703_at		1437712_x_at
1416121_at			1423981_x_at					1418197_at		1418225_at
1450135_at			1416316_at					1447822_x_at		1429950_at
1453374_at			1452492_a_at					1437961_x_at		1434365_a_at
1448233_at			1429593_at					1421697_at		1451970_at
1428822_a_at			1423389_at					1435901_at		1424656_s_at
1440815_x_at			1452469_a_at					1428731_at		1437032_x_at
1418301_at			1415896_x_at					1435195_at		1448379_at
1426655_a_at			1423076_at					1416156_at		1457110_at
1455200_at			1449109_at					1429085_at		1427917_s_at
1428074_at			1419358_at					1436327_a_at		1442770_at
1437363_at			1421245_at					1435386_at		1440256_at
1418133_at			1419588_at					1432615_at		1449221_a_at
1456609_at			1418740_at					1432573_at		1426705_s_at
1433615_at			1415874_at					1420243_at		1460198_a_at
1420110_s_at			1447806_s_at					1456389_at		1439189_at
1418128_at			1454246_at					1457185_at		1455821_x_at
1452117_a_at			1420928_at					1430664_at		1448801_a_at
1427081_at			1455695_at					1450644_at		1436416_x_at
1430066_at			1430367_at					1418865_at		1420846_at
1417444_at			1417751_at					1444631_at		1421268_at
1451365_at			1421500_at					1440999_at		1433608_at
1426368_at			1446416_at					1437696_at		1434192_at
1435584_at			1447602_x_at					1438552_x_at		1435345_at
1427912_at			1447657_s_at							1445649_x_at
1429154_at			1421594_a_at							1448565_at
1436533_at			1422195_s_at							1425993_a_at
1452843_at			1450117_at							1435372_a_at
1429965_at			1425229_a_at							1449200_at
1434474_at			1423601_s_at							1452026_a_at
1423651_at			1427666_a_at							1437565_a_at
1449491_at			1434175_s_at							1424425_a_at
1455679_at			1418484_at							1435802_at
1449195_s_at			AFFX-TransRecMur/X57349_M_at							1426915_at
1428646_at			1419655_at							1428754_at
1434909_at			1449640_at							1433778_at
1456225_x_at			1452934_at							1434724_at
1455630_at			1454729_at							1423419_at
1416625_at			1451344_at							1448138_at
1434990_at			1451181_at							1456585_x_at
1460677_at			1439550_at							1428160_at
1448883_at			1458480_at							1418305_s_at
1452013_at			1436600_at							1451483_s_at
1428509_at			1449577_x_at							1422668_at
1451507_at			1426809_at							1452323_at
1436072_at			1447284_at							1455796_x_at
1458550_at			1421600_a_at							1455391_at
1426433_at			1436919_at							1428783_at
1419467_at			1416926_at							1438606_a_at
1420664_s_at			1454971_x_at							1437264_at
1425029_a_at			1448548_at							1427245_at
1434399_at			1452985_at							1433542_at
1433626_at			1436628_at							1424622_at
1422552_at			1439760_x_at							1420013_s_at
1436737_a_at			1449869_at							1436073_at
1438648_x_at			1422416_s_at							1425352_at
1422823_at			1422921_at							1434019_at
1450896_at			1437615_s_at							1423475_at
1437268_at			1422228_at							1429385_at
1435913_at			1428504_at							1455640_a_at
1418752_at			1431782_s_at							1453182_a_at
1449357_at			1440178_x_at							1420157_s_at
1429582_at			1451476_at							1427944_at
1430686_at			1436081_a_at							1420056_s_at
1423592_at			1455944_at							1424884_at
1418911_s_at			1456816_at							1418409_at
1439505_at										1452127_a_at
1456824_at										1455625_at
1435720_at										1428304_at
1451721_a_at										1439251_at
1435820_x_at										1427590_at
1432754_at										1455127_at
1428833_at										1453747_at
1450058_at										1451197_s_at
1416627_at										1434570_at
1427095_at										1440339_at
1432273_a_at										1436396_at
1415923_at										1437623_x_at
1450493_at										1445632_at
1453760_at										1447683_x_at
1420617_at										1418090_at
1437665_at										1428389_s_at
1418059_at										1420259_at
1452328_s_at										1454869_at
1436913_at										1418068_at
1435387_at										1417658_at
1434089_at										1438381_x_at
1418085_at										1452132_at
1417300_at										1426381_at
1437635_at										1438004_at
1452864_at										1428711_at
1423832_at										1417724_at
1416194_at										1452718_at
1426875_s_at										1426670_at
1425108_a_at										1420004_s_at
1460608_at										1423865_at
1452207_at										1417139_at
1453163_at										1437856_at
1418259_a_at										1452091_a_at
1419030_at										1437985_a_at
1439050_at										1452390_at
1435549_at										1439091_at
1433944_at										1452353_at
1455889_at										1445468_at
1450344_a_at										1423051_at
1431353_at										1437836_x_at
1418186_at										1448396_at
1450215_at										1435432_at
1436590_at										1448479_at
1416344_at										1441115_at
1439103_at										1431429_a_at
1430221_at										1424514_at
1433610_at										1442015_at
1417047_at										1428522_at
1455165_at										1457041_at
1437260_at										1431064_at
1451355_at										1442008_at
1425605_a_at										1457027_at
1429027_at										1418032_at
1419145_at										1437851_x_at
1448169_at										1426737_at
1452253_at										1431172_at
1435392_at										1423473_at
1442845_at										1460704_at
1429925_at										1448626_at
1434489_at										1451092_a_at
1452127_a_at										1448268_at
1422877_at										1424141_at
1421841_at										1448810_at
1451255_at										1456113_at
1439947_at										1455351_at
1435281_at										1435085_at
1453412_a_at										1416330_at
1433670_at										1417638_at
1439630_x_at										1431235_at
1449583_at										1448233_at
1454742_at										1417703_at
1433992_at										1429682_at
1420913_at										1449814_at
1416094_at										1452687_at
1427367_at										1422050_at
1447602_x_at										1435701_at
1453282_at										1456738_s_at
1456544_at										1436206_at
1421425_a_at										1448257_at
1435207_at										1425230_at
1438011_at										1416969_at
1439665_at										1427381_at
1434007_at										1449558_at
1436939_at										1435393_at
1441241_at										1428665_at
1448507_at										1420813_at
1452357_at										1434318_a_at
1425047_a_at										1436739_at
